# Supplementary material for: Variation of Polyphenol Content and Antioxidant Activity in Some Bilberry (Vaccinium myrtillus L.) Populations from Romania
Source: MDPI journal article supplement (doi:10.3390/agronomy11122557), 2021-12-16
Supplement: s1 [file s1]

**Table S1.** DPPH radical scavenging activity (%) for different concentrations of fruits extracts in bilberry populations

| Population         | Concentration             |                           |                           |                           |                           |
|--------------------|---------------------------|---------------------------|---------------------------|---------------------------|---------------------------|
|                    | 10 mg/mL                  | 5 mg/mL                   | 2.5 mg/mL                 | 1.25 mg/mL                | 0.67 mg/mL                |
| Muntele Mic        | 84.70±2.23 c <sup>x</sup> | 81.40±2.25 c <sup>y</sup> | 78.04±2.30 c <sup>z</sup> | 73.55±2.20 d <sup>u</sup> | 70.47±1.88 c <sup>v</sup> |
| Raul Lung          | 87.08±0.57 b <sup>x</sup> | 83.08±0.63 b <sup>y</sup> | 79.59±0.48 b <sup>z</sup> | 76.76±0.37 b <sup>u</sup> | 73.51±0.34 a <sup>v</sup> |
| Semenic            | 82.60±1.77 d <sup>x</sup> | 79.89±2.19 d <sup>y</sup> | 77.80±2.23 c <sup>z</sup> | 75.19±2.18 c <sup>u</sup> | 71.52±1.93 b <sup>v</sup> |
| Cuntu              | 81.09±2.08 e <sup>x</sup> | 78.54±1.92 e <sup>y</sup> | 75.07±1.77 e <sup>z</sup> | 72.74±1.92 e <sup>u</sup> | 70.46±1.62 c <sup>v</sup> |
| Sadova Noua        | 82.69±1.87 d <sup>x</sup> | 78.73±2.08 e <sup>y</sup> | 75.89±2.73 d <sup>z</sup> | 72.84±2.55 e <sup>u</sup> | 70.94±2.02 c <sup>v</sup> |
| Padis              | 89.22±1.09 a <sup>x</sup> | 85.62±1.56 a <sup>y</sup> | 81.31±1.85 a <sup>z</sup> | 77.81±1.01 a <sup>u</sup> | 73.09±0.38 a <sup>v</sup> |
| Concentration mean | 84.57±0.76 X              | 81.21±0.80 Y              | 77.95±0.84 Z              | 74.81±0.77 V              | 71.66±0.62 U              |
| Ascorbic acid      | 0.1 mg/mL                 | 0.08 mg/mL                | 0.06 mg/mL                | 0.04 mg/mL                | 0.02 mg/mL                |
|                    | 71.30±0.31                | 70.76±0.12                | 62.07±0.27                | 61.82±0.27                | 51.49±0.21                |

Concentrations LSD5% = 0.24; Concentration x population LSD5% = 0.58

Data represents mean ± SE. Different letters (a, b, c, d, e) in the column indicate significant differences ( $p \leq 0.05$ ) between populations. Different superscript letters (x, y, z, u, v) in the row indicate significant differences ( $p \leq 0.05$ ) between concentrations.

Capital letters were used for concentration's means (X, Y, Z, V, U)) comparisons
