# Supplementary material for: Variation of Polyphenol Content and Antioxidant Activity in Some Bilberry (Vaccinium myrtillus L.) Populations from Romania
Source: MDPI journal article supplement (doi:10.3390/agronomy11122557), 2021-12-16
Supplement: s1 [file s1]

**Table S2.** DPPH radical scavenging activity (%) for different concentrations of fruits extracts in bilberry populations during 2018-2020

| Year          | 2018            |                |                |                 |                 |
|---------------|-----------------|----------------|----------------|-----------------|-----------------|
| Population    | Concentration   |                |                |                 |                 |
|               | 10 mg/mL        | 5 mg/mL        | 2.5 mg/mL      | 1.25 mg/mL      | 0.67 mg/mL      |
| Muntele Mic   | 90.64±0.13 b x  | 85.52±0.15 b y | 83.03±0.02 c z | 78.14±0.10 c u  | 73.22±0.01 d v  |
| Raul Lung     | 88.11±0.29 c x  | 83.39±0.21 c y | 80.49±0.12 d z | 77.36±0.06 cd u | 73.72±0.23 cd v |
| Semenic       | 84.76±0.44 d x  | 83.92±0.23 c y | 83.44±0.08 c y | 81.59±0.03 a z  | 76.60±0.09 a u  |
| Cuntu         | 83.40±0.30 e x  | 82.02±0.18 d y | 78.31±0.16 e z | 76.46±0.03 d u  | 74.33±0.21 c v  |
| Sadova Noua   | 85.65±0.13 d x  | 85.19±0.08 b x | 84.77±0.18 b x | 80.21±0.08 b y  | 75.21±0.05 b z  |
| Padis         | 92.88±0.72 a x  | 91.76±0.05 a y | 88.68±0.10 a z | 81.86±0.03 a u  | 73.39±0.03 d v  |
| Year          | 2019            |                |                |                 |                 |
| Population    | Concentration   |                |                |                 |                 |
|               | 10 mg/mL        | 5 mg/mL        | 2.5 mg/mL      | 1.25 mg/mL      | 0.67 mg/mL      |
| Muntele Mic   | 87.47±0.33 ab x | 86.25±0.87 a y | 82.27±0.11 a z | 77.74±0.04 a v  | 75.15±0.01 a u  |
| Raul Lung     | 88.30±0.10 a x  | 85.09±0.05 b y | 80.62±0.04 b z | 77.65±0.07 ab v | 74.55±0.04 bc u |
| Semenic       | 87.34±0.23 ab x | 84.59±0.20 b y | 80.97±0.05 b z | 77.13±0.04 ab v | 73.99±0.06 cd u |
| Cuntu         | 86.87±0.11 b x  | 82.74±0.11 c y | 78.88±0.10 c z | 76.69±0.02 b v  | 73.02±0.01 d u  |
| Sadova Noua   | 87.70±0.01 ab x | 79.61±0.24 e y | 76.57±0.16 d z | 75.27±0.05 d v  | 74.75±0.03 bc v |
| Padis         | 85.38±0.23 c x  | 81.72±0.20 d y | 77.28±0.05 d z | 75.68±0.04 c v  | 71.66±0.06 e u  |
| Year          | 2020            |                |                |                 |                 |
| Population    | Concentration   |                |                |                 |                 |
|               | 10 mg/mL        | 5 mg/mL        | 2.5 mg/mL      | 1.25 mg/mL      | 0.67 mg/mL      |
| Muntele Mic   | 75.99±0.40 c x  | 72.45±0.53 c y | 68.84±0.16 b z | 64.76±0.17 c v  | 63.03±0.63 de u |
| Raul Lung     | 84.82±0.42 b x  | 80.77±0.23 b y | 77.67±0.12 a z | 75.28±0.13 a v  | 72.26±0.03 b u  |
| Semenic       | 75.70±0.71 c x  | 71.16±0.42 d y | 68.99±0.33 b z | 66.86±0.42 b v  | 63.97±0.24 cd u |
| Cuntu         | 73.01±0.49 d x  | 70.86±0.38 d y | 68.01±0.32 b z | 65.06±0.21 c v  | 64.03±0.06 c u  |
| Sadova Noua   | 75.60±0.81 c x  | 70.92±0.08 d y | 65.91±0.27 c z | 63.03±0.16 d v  | 62.87±0.21 e v  |
| Padis         | 89.42±0.17 a x  | 83.37±0.13 a y | 77.96±0.19 a z | 75.89±0.15 a v  | 74.21±0.09 a u  |
| Ascorbic acid | 0.1 mg/mL       | 0.08 mg/mL     | 0.06 mg/mL     | 0.04 mg/mL      | 0.02 mg/mL      |
|               | 71.30±0.31      | 70.76±0.12     | 62.07±0.27     | 61.82±0.27      | 51.49±0.21      |

Concentration x population LSD5% = 1.02

Data represents mean ± SE. Different letters (a, b, c, d, e) in the column indicate significant differences ( $p \leq 0.05$ ) between populations. Different superscript letters (x, y, z, u, v) in the row indicate significant differences ( $p \leq 0.05$ ) between concentrations.
